# Supplementary material
Source: publisher figshare collection journal article supplement (https://springernature.figshare.com/ndownloader/files/20775519)
Supplement: Supplementary file [file 20775519]

## The 4th national oral health survey (3-5 year)

ID: \_\_\_\_\_ Name : \_\_\_\_\_

Gender : \_\_\_\_\_ Man=1 Nation: \_\_\_\_\_ Census register : \_\_\_\_\_ Urban=1  
Female=2 Rural=2

Birthdate: \_\_\_\_\_

Year: \_\_\_\_\_ 2015=1 Date: \_\_\_\_\_ Inspector number: \_\_\_\_\_  
2016=2

### 1 . Dentition status

|           |    |    |    |    |    |    |    |    |    |    |    |    |
|-----------|----|----|----|----|----|----|----|----|----|----|----|----|
|           |    | 55 | 54 | 53 | 52 | 51 | 61 | 62 | 63 | 64 | 65 |    |
|           | 16 | 15 | 14 | 13 | 12 | 11 | 21 | 22 | 23 | 24 | 25 | 26 |
| Dentition |    |    |    |    |    |    |    |    |    |    |    |    |
| Dentition |    |    |    |    |    |    |    |    |    |    |    |    |
|           | 16 | 15 | 14 | 13 | 12 | 11 | 21 | 22 | 23 | 24 | 25 | 26 |
|           |    | 55 | 54 | 53 | 52 | 51 | 61 | 62 | 63 | 64 | 65 |    |

| Primary teeth status | Permanent teeth status                   |
|----------------------|------------------------------------------|
| A                    | 0 Sound                                  |
| B                    | 1 Caries                                 |
| C                    | 2 Filled with caries                     |
| D                    | 3 Filled, no caries                      |
| E                    | 4 Missing due to caries                  |
| X                    | 5 Missing for another reason             |
| F                    | 6 Fissure sealant                        |
| G                    | 7 Fix prosthesis/crown. abutment, veneer |
| T                    | 8 Trauma                                 |
| N                    | 9 Not record                             |

|                                             |  |            |  |
|---------------------------------------------|--|------------|--|
| Immediate treatment and treatment scheduled |  | Table type |  |
| Yes=1                                       |  | Original=1 |  |
| No=2                                        |  | Review=2   |  |
